# Supplementary material for: Weighted single-step GWAS and RNA sequencing reveals key candidate genes associated with physiological indicators of heat stress in Holstein cattle
Source: PubMed Central journal article supplement (PMC9392250; doi:10.1186/s40104-022-00748-6), 2022-08-20

# The Most Enriched GO Terms

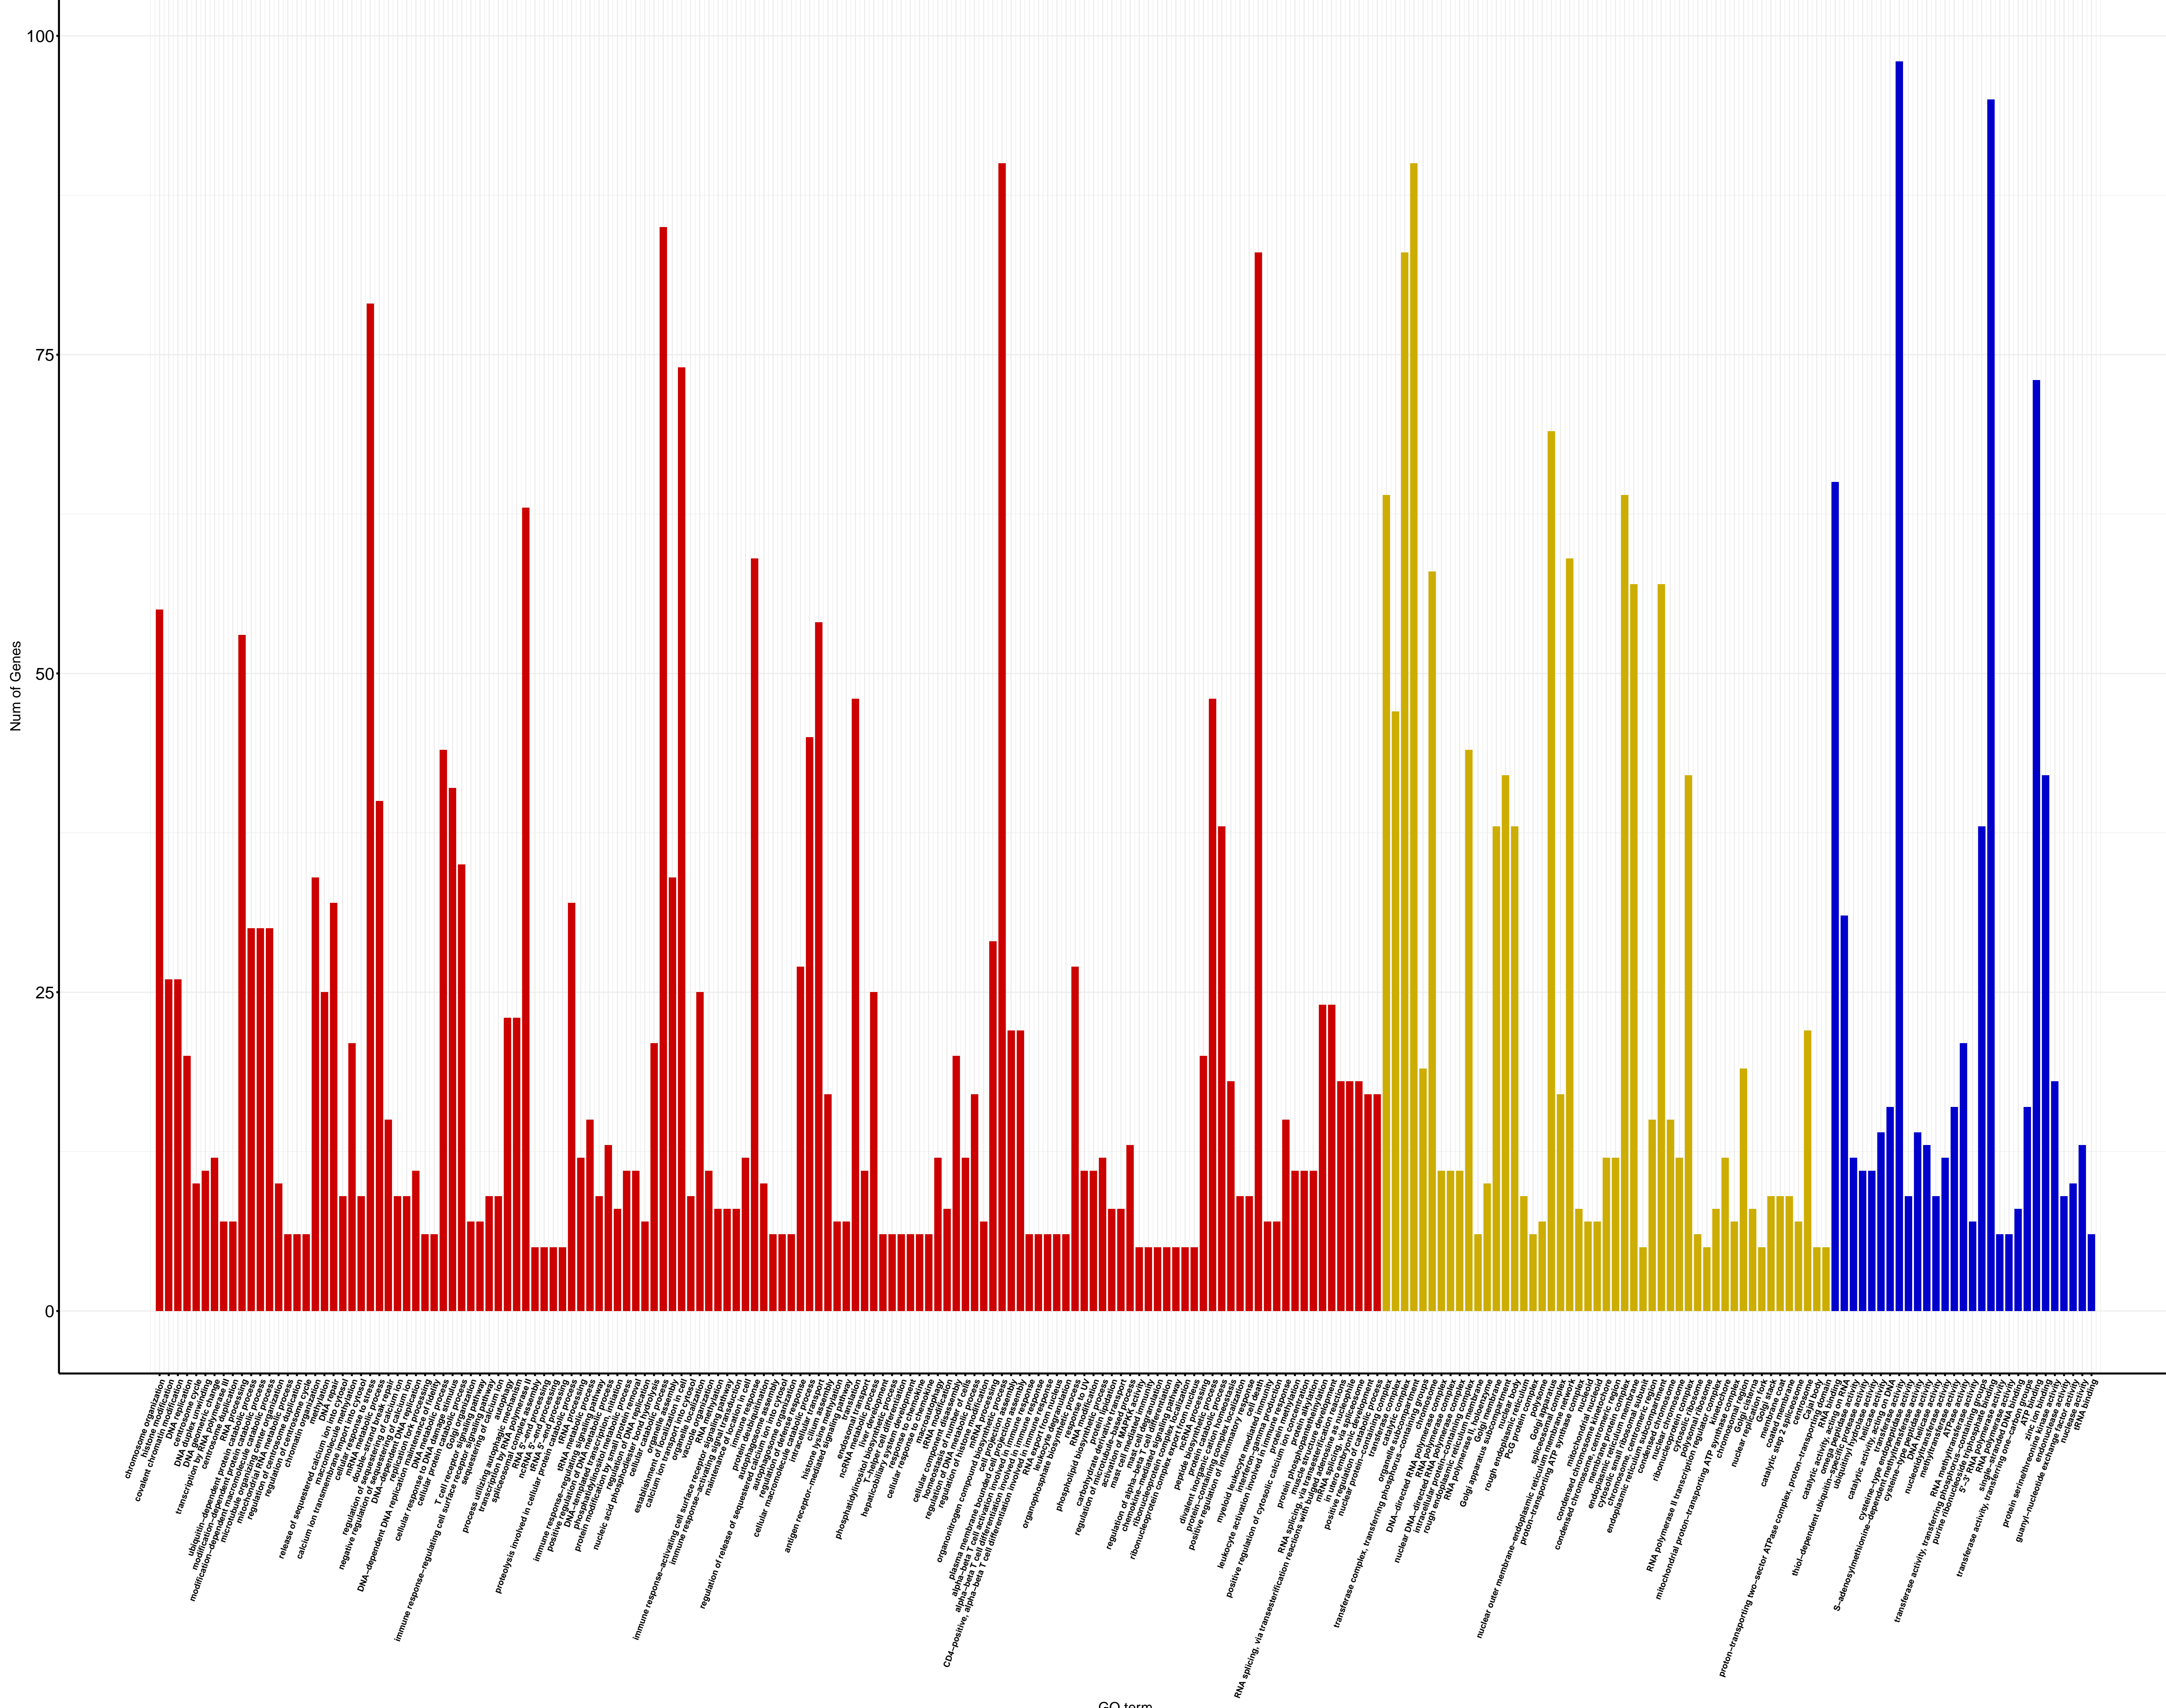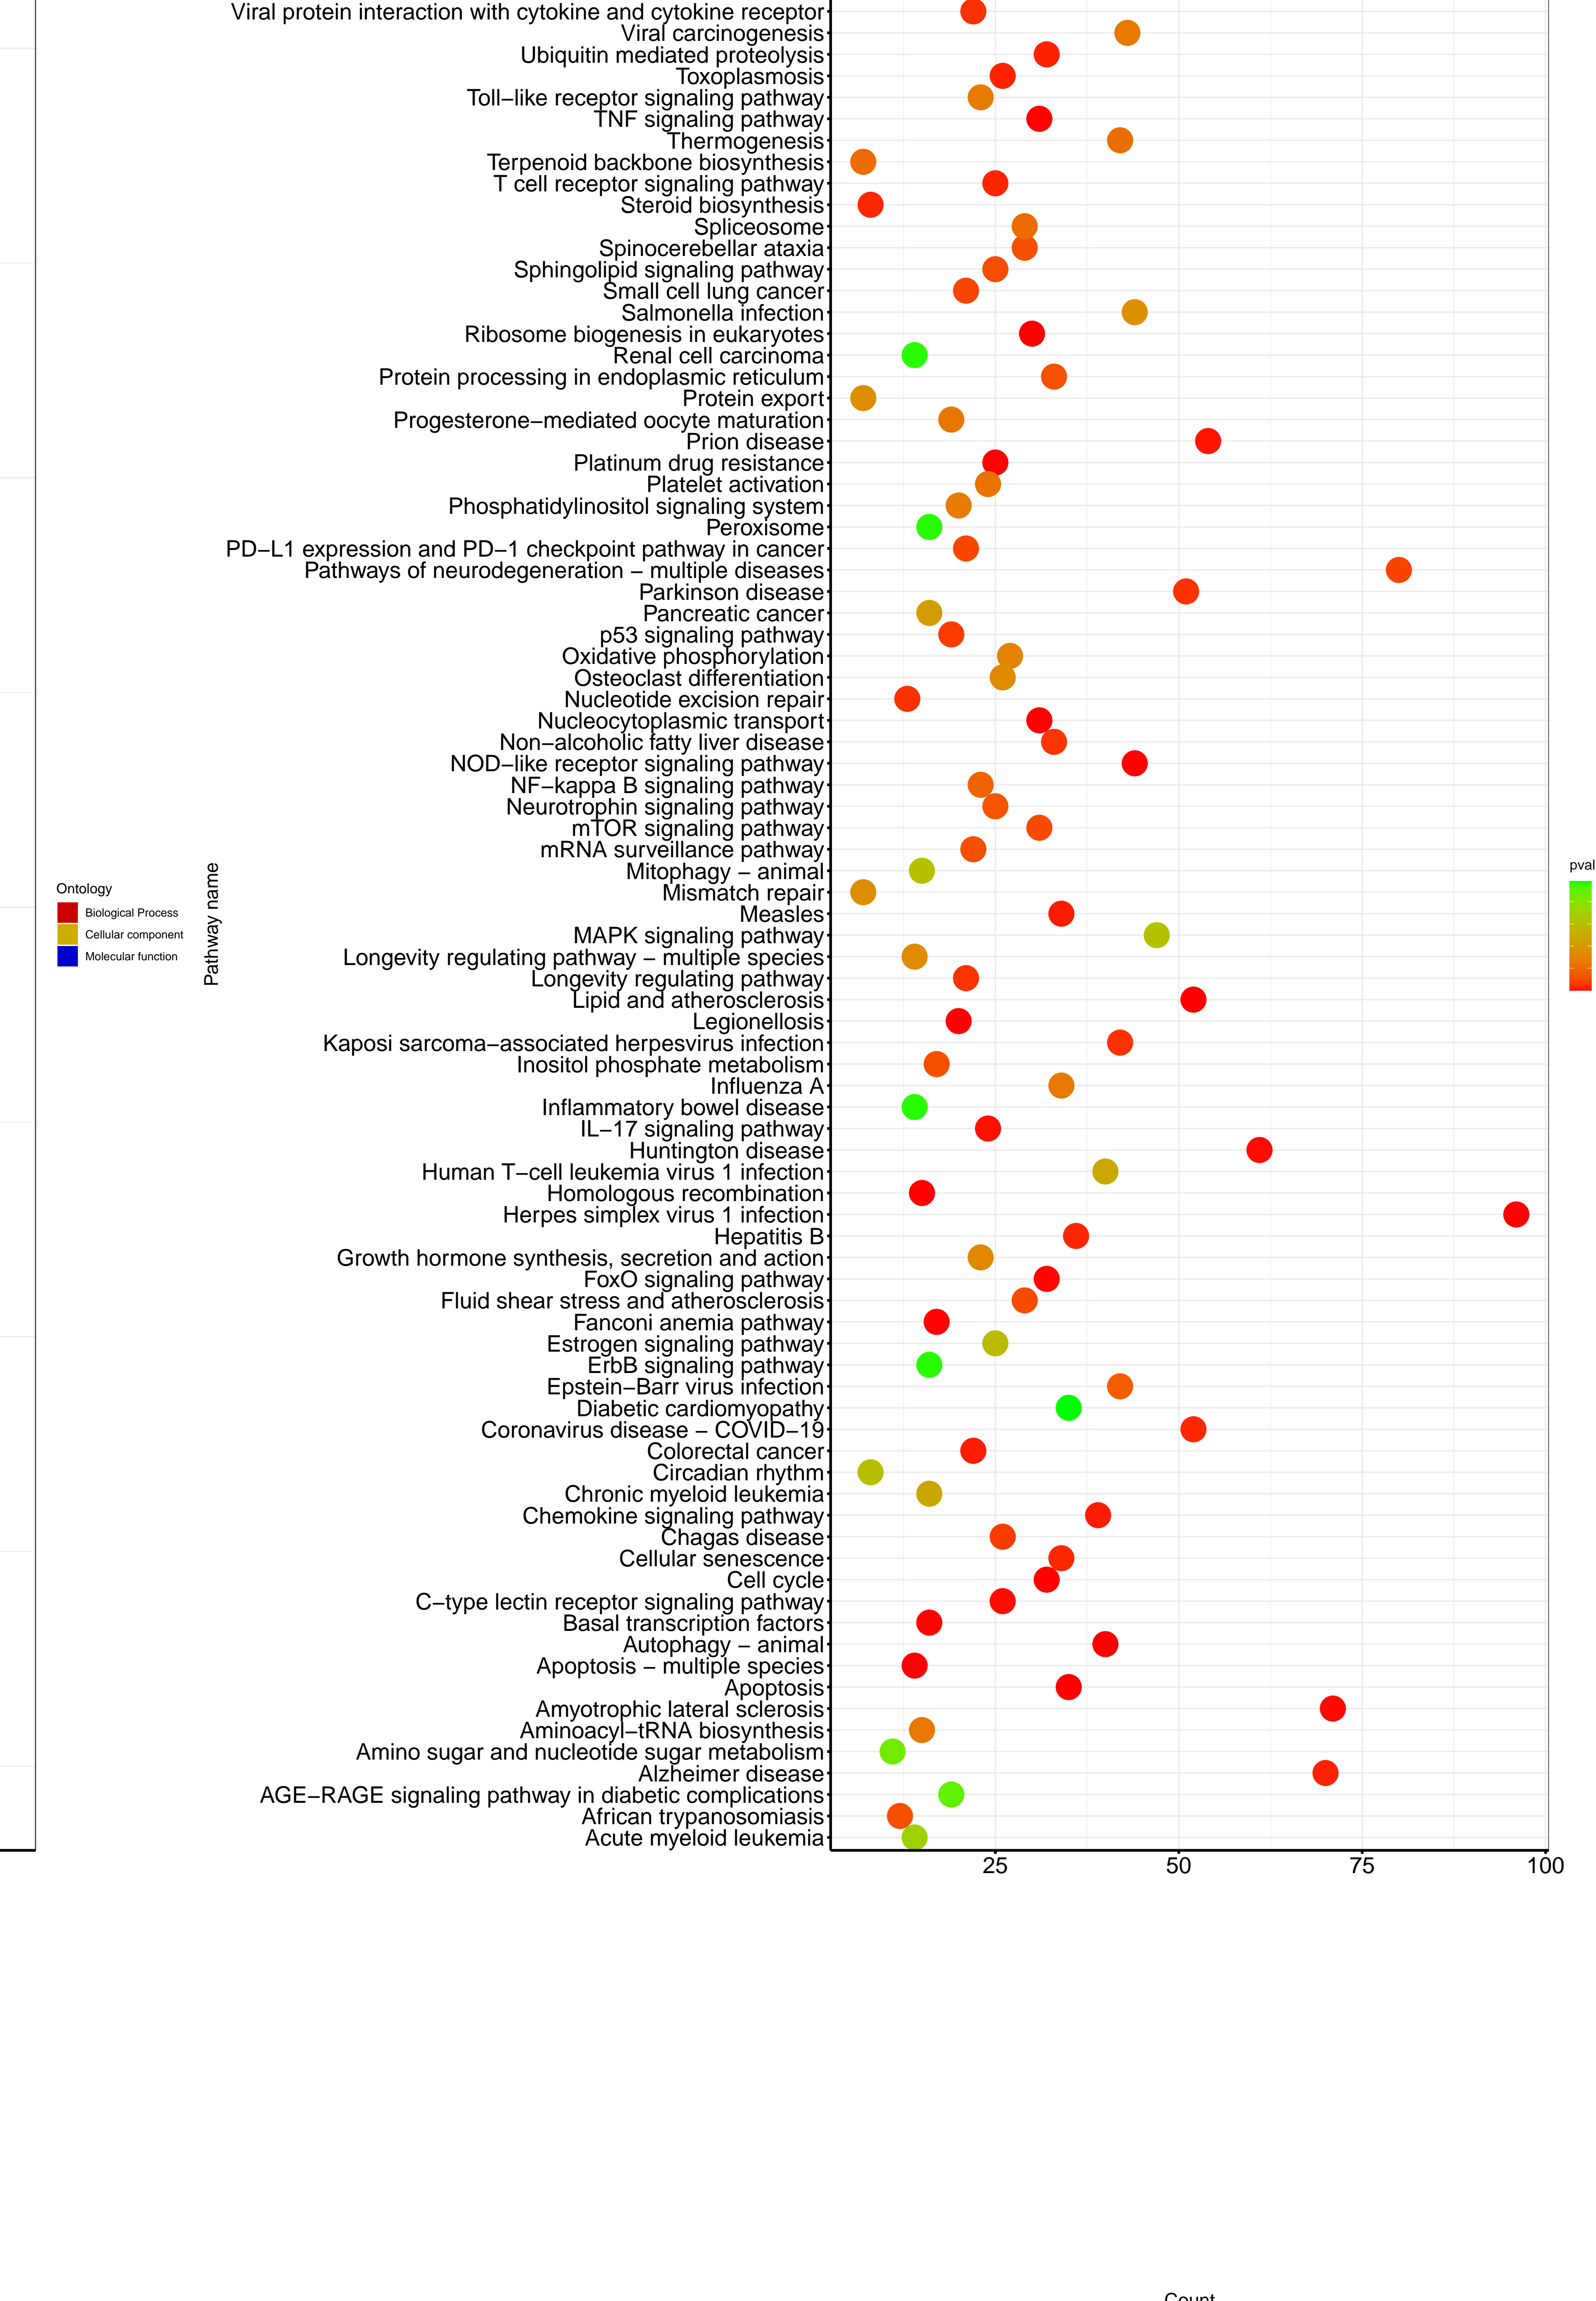

Supplement: 40104_2022_748_MOESM3_ESM.pdf [file 40104_2022_748_MOESM3_ESM.pdf]
